# Supplementary material for: Taxifolin protects rat against myocardial ischemia/reperfusion injury by modulating the mitochondrial apoptosis pathway
Source: PubMed Central journal article supplement (PMC6360081; doi:10.7717/peerj.6383), 2019-01-31
Supplement: peerj-07-6383-s004.pdf [file peerj-07-6383-s004.pdf]

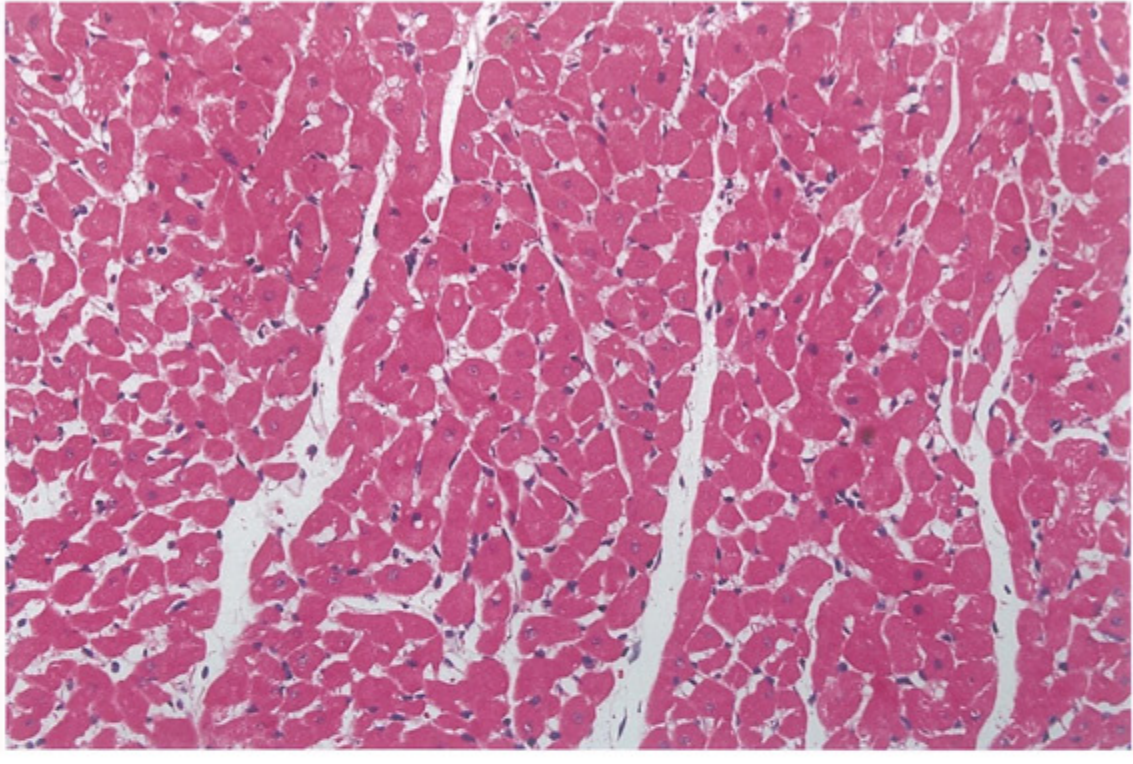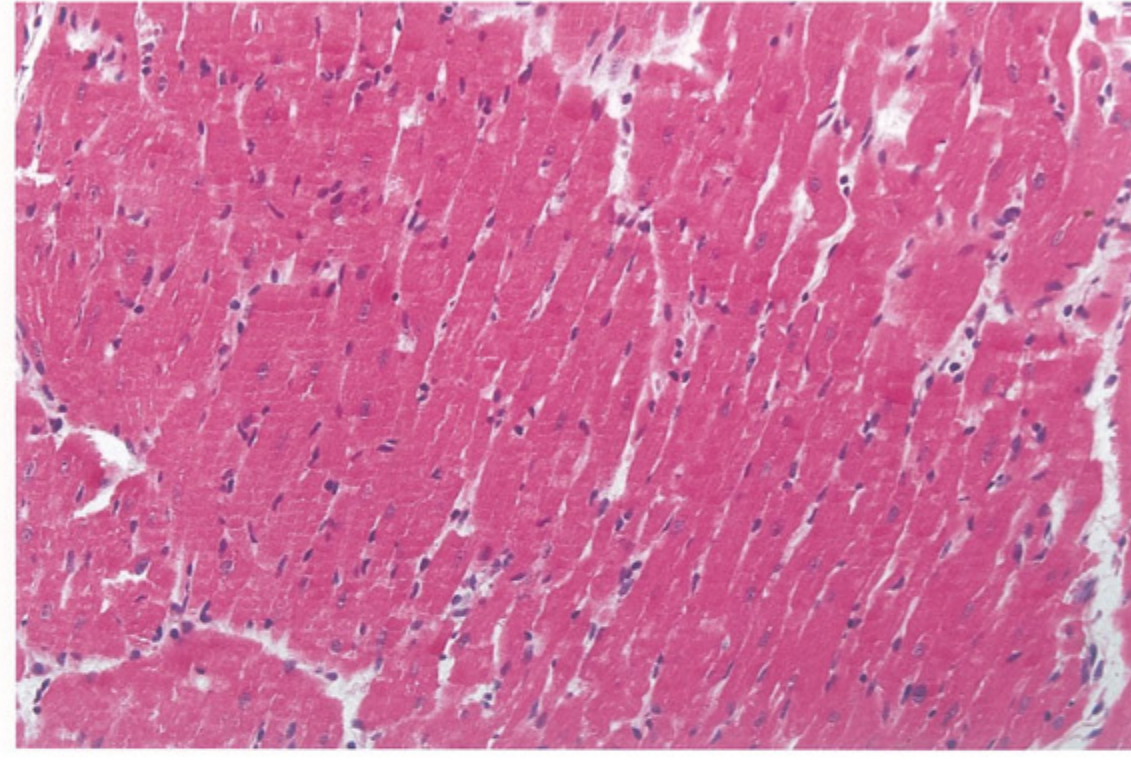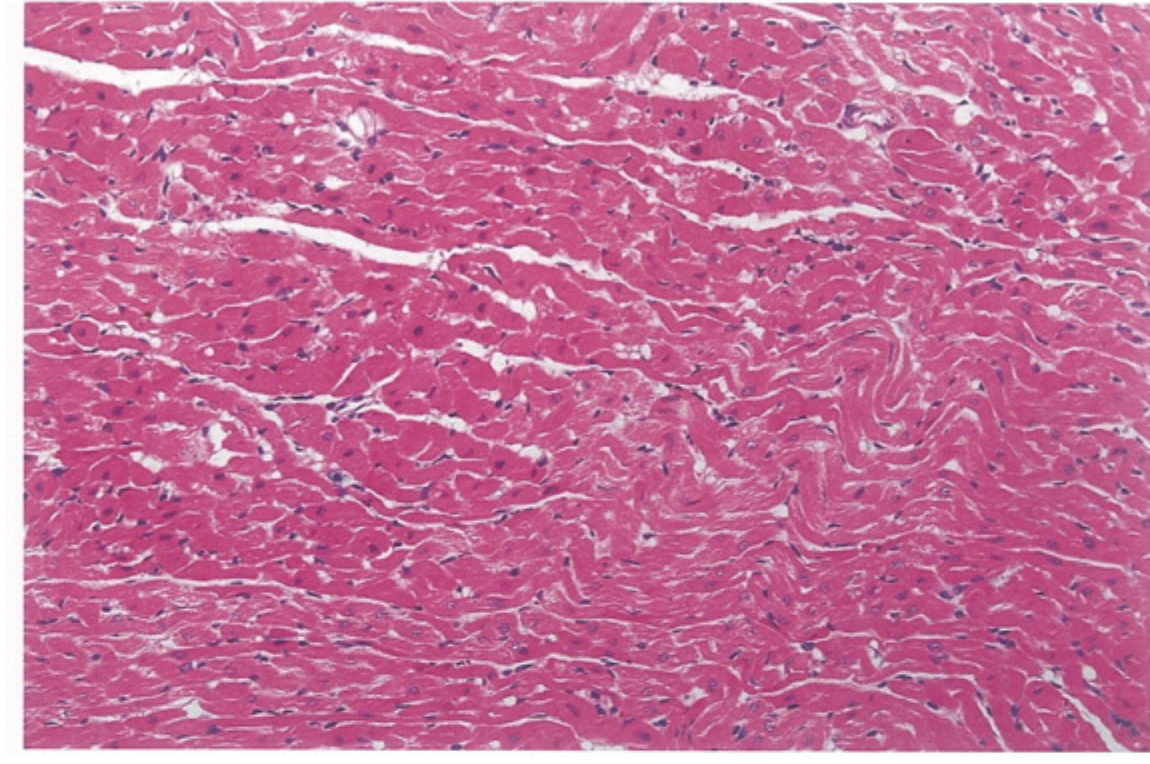

**Control**

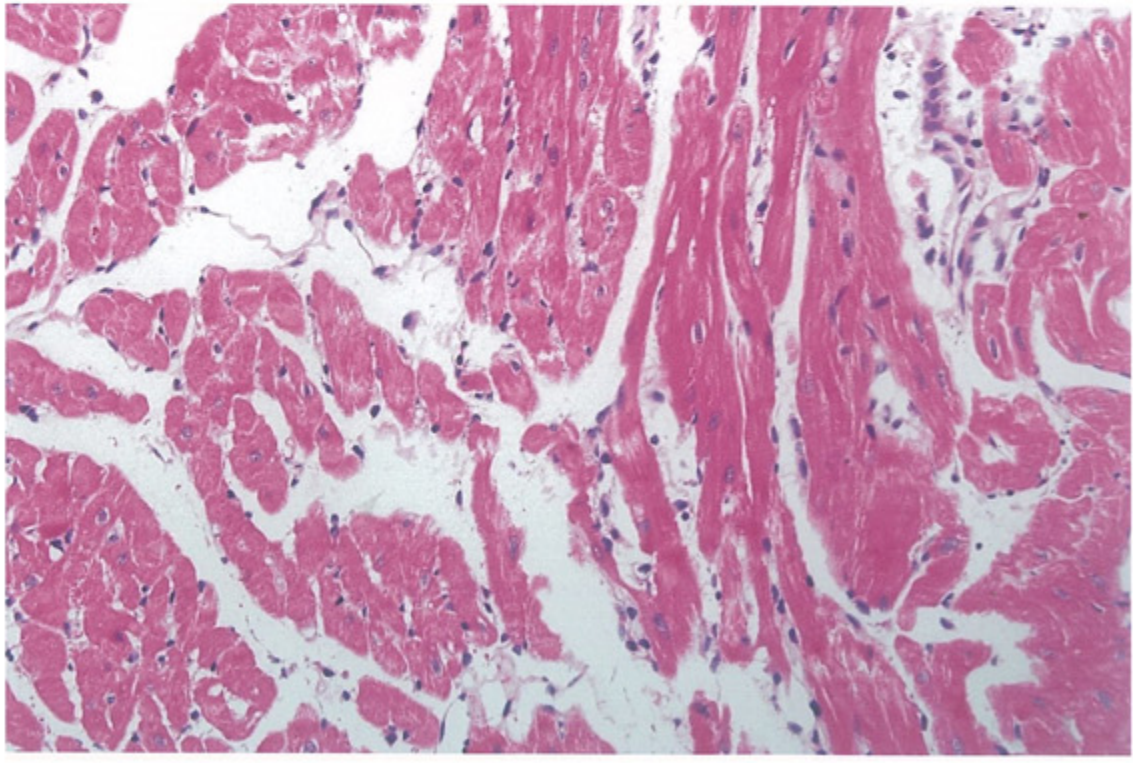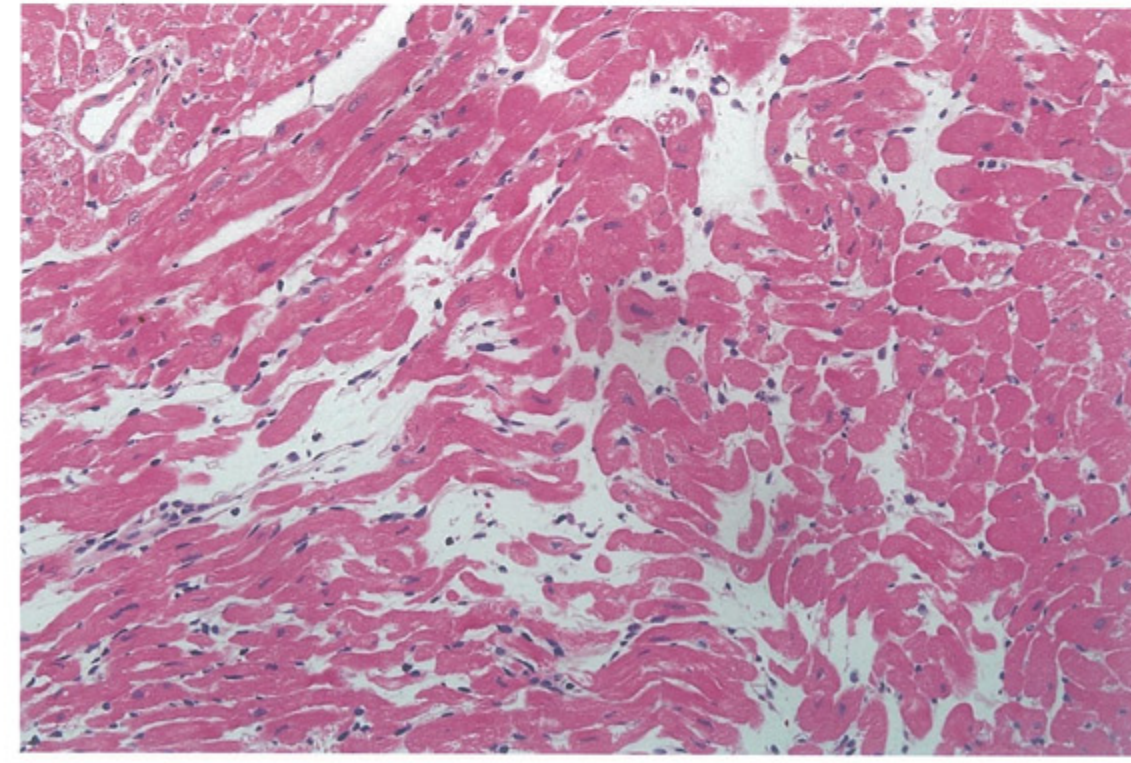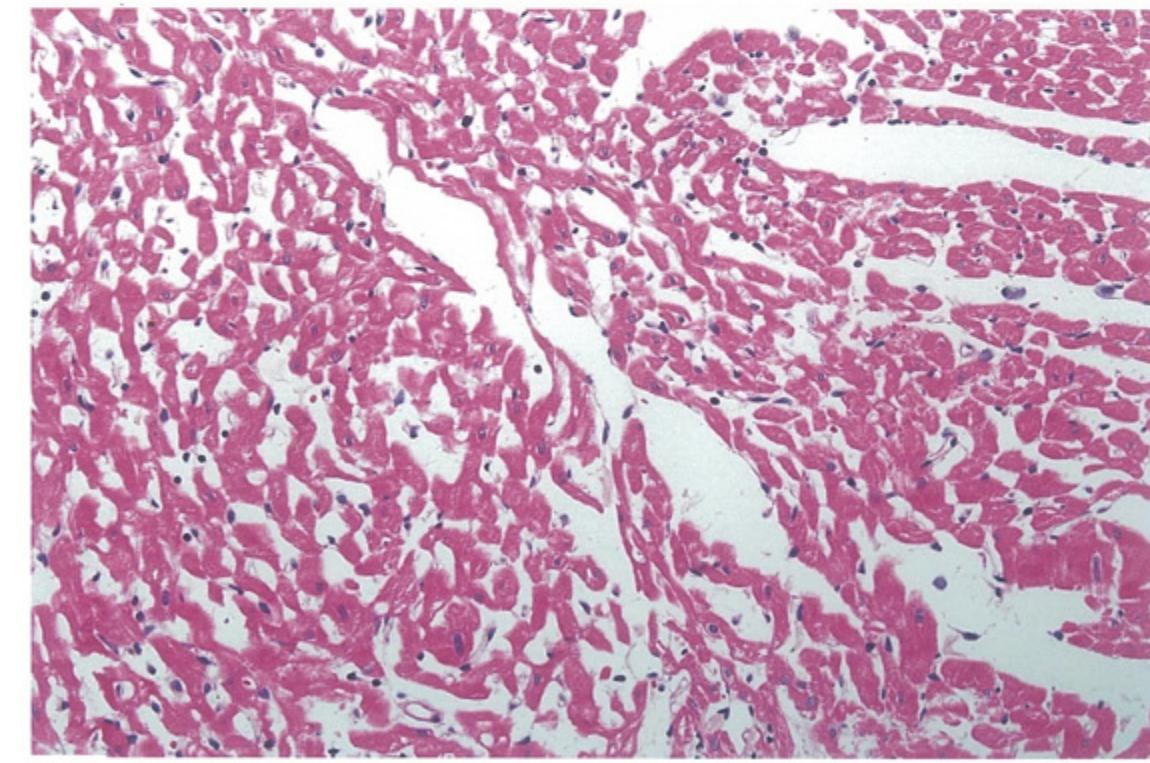

**I/R**

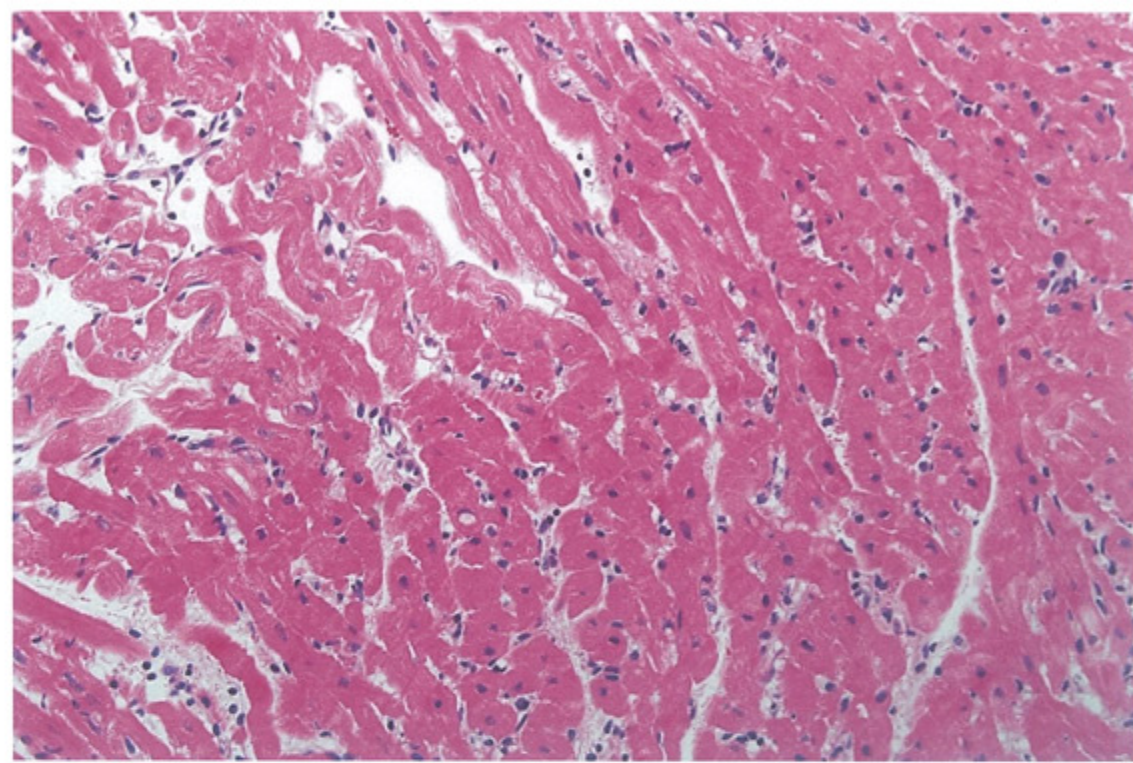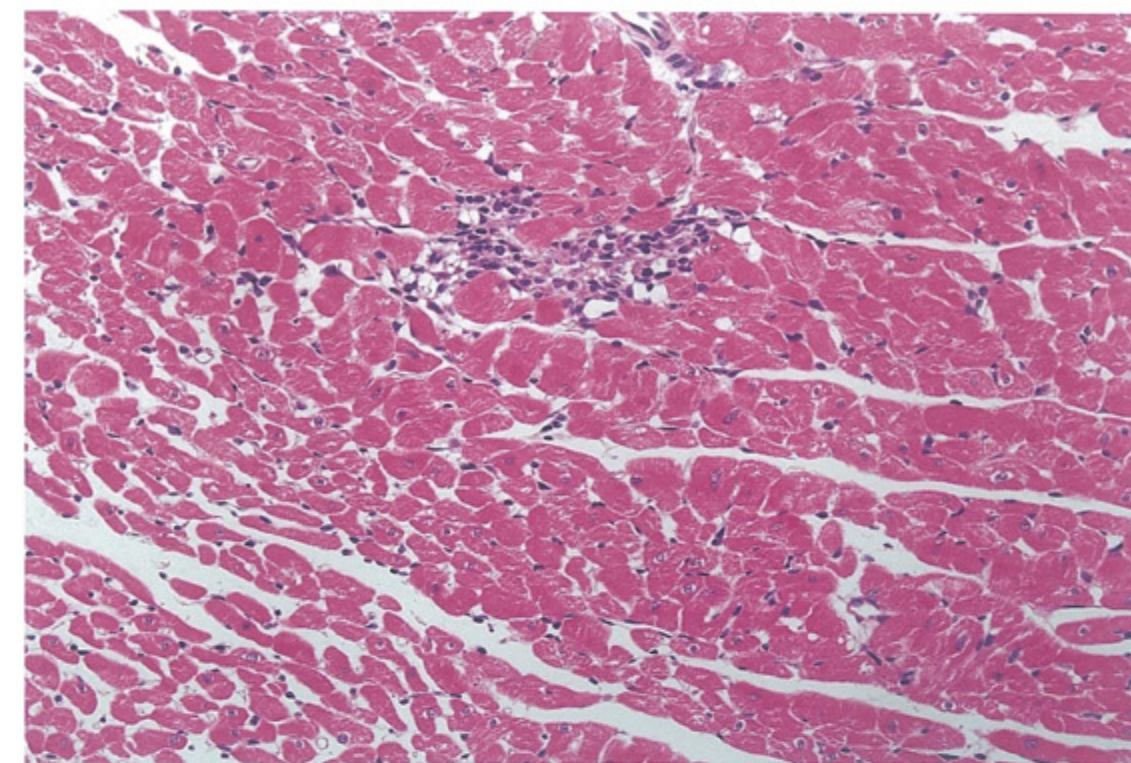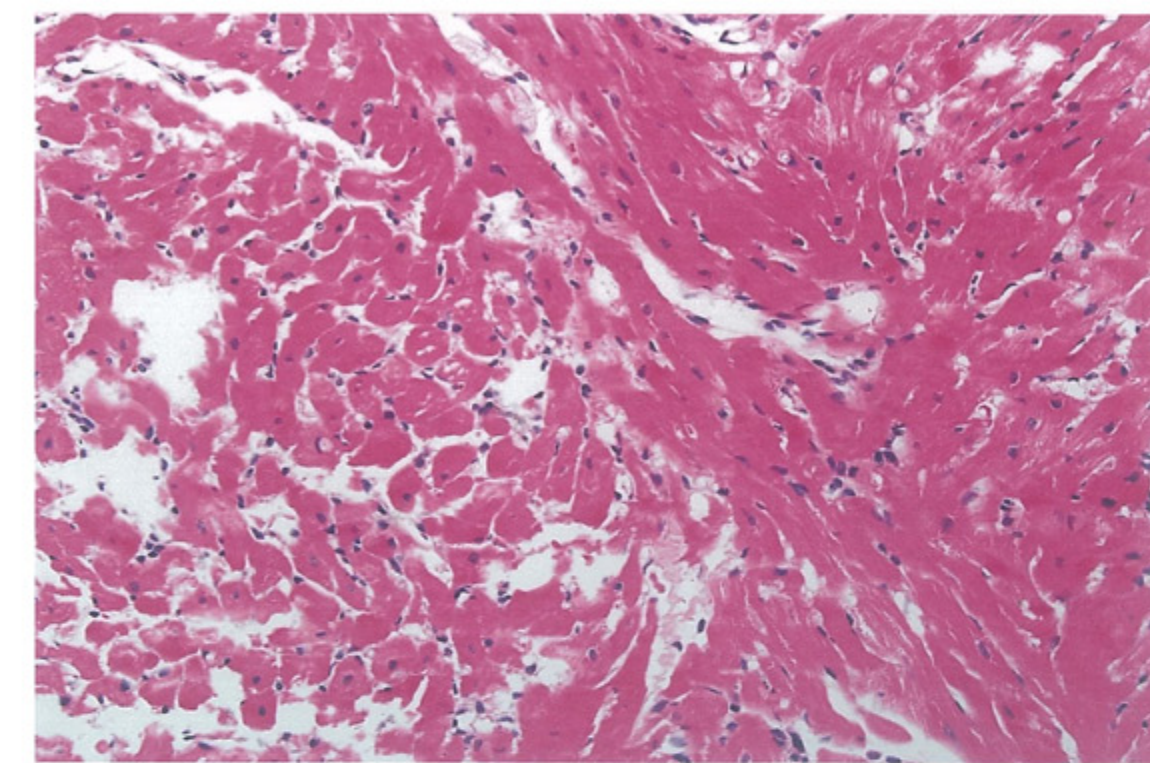

**TAX 5  $\mu$ M**

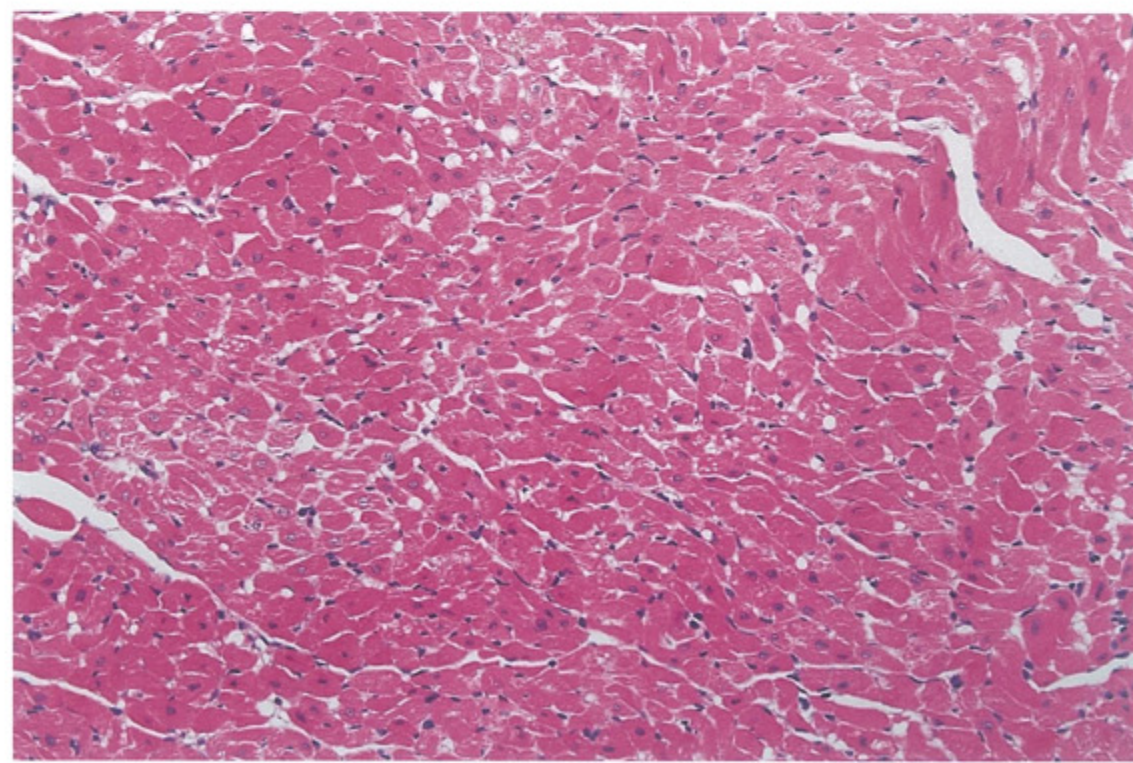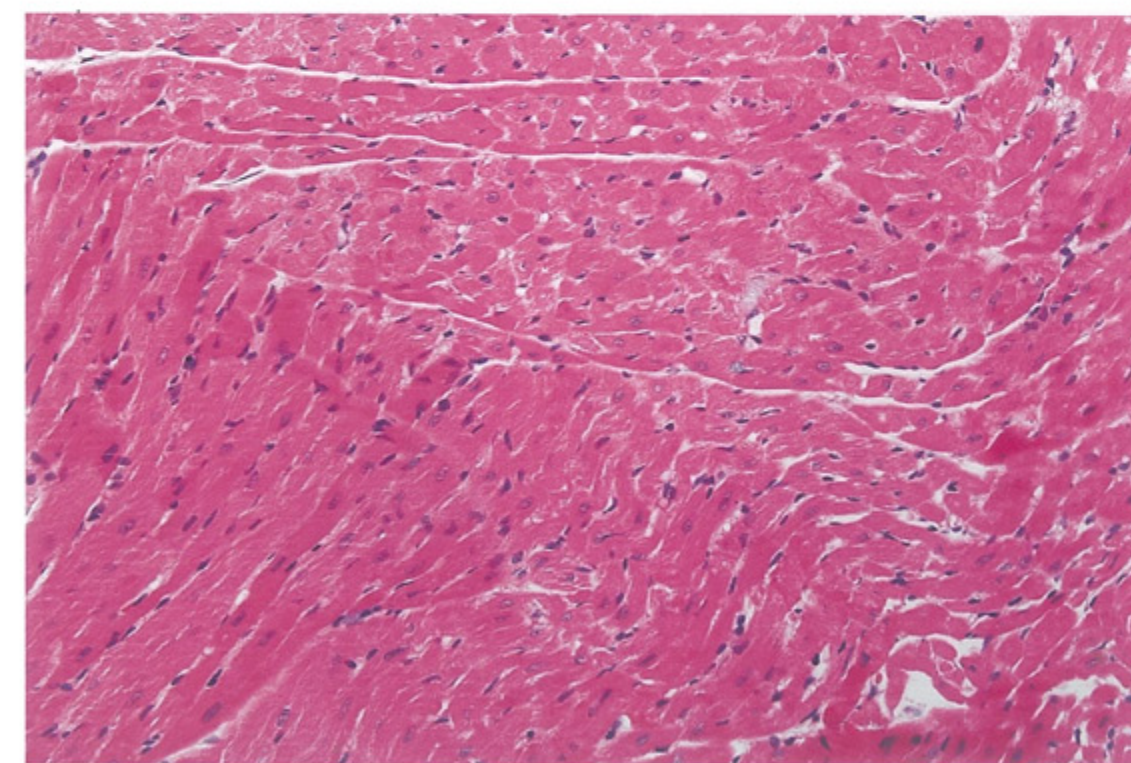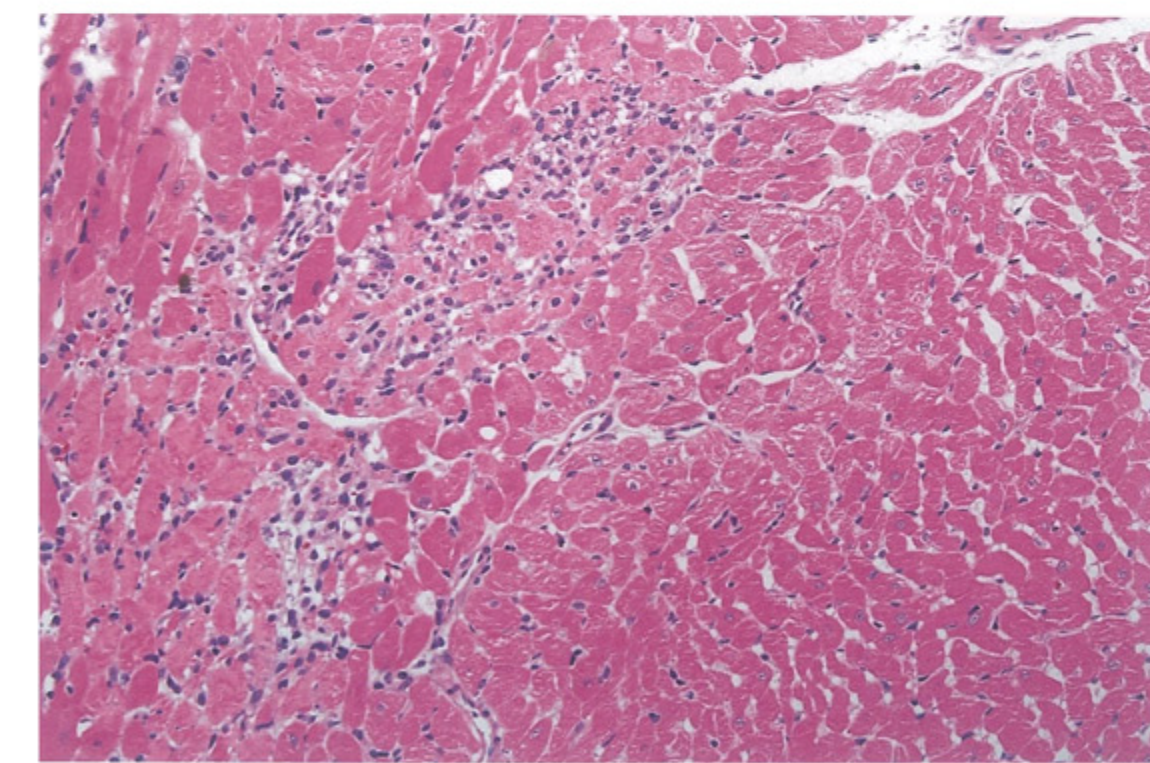

**TAX 15  $\mu$ M**
