# Supplementary material for: Taxifolin protects rat against myocardial ischemia/reperfusion injury by modulating the mitochondrial apoptosis pathway
Source: PubMed Central journal article supplement (PMC6360081; doi:10.7717/peerj.6383), 2019-01-31
Supplement: peerj-07-6383-s005.pdf [file peerj-07-6383-s005.pdf]

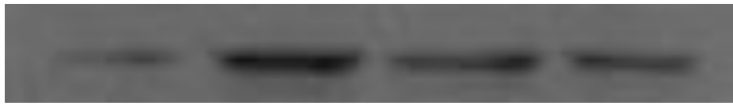

**active-caspase 3 (1)**

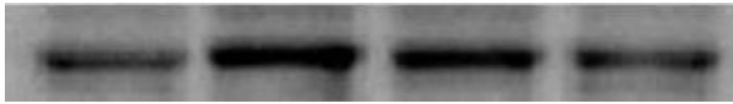

**active-caspase 3 (2)**

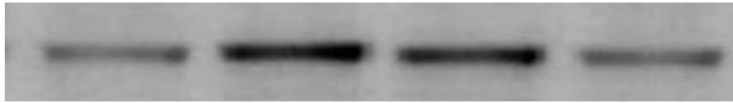

**active-caspase 3 (3)**

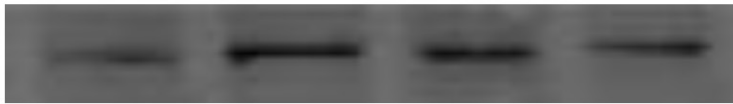

**active-caspase 9 (1)**

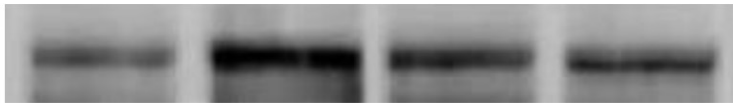

**active-caspase 9 (2)**

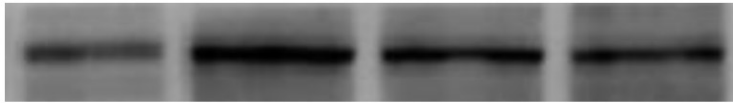

**active-caspase 9 (3)**

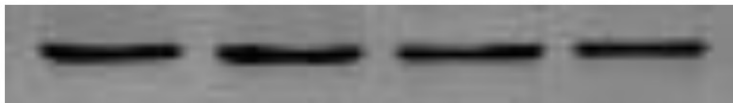

**β-actin (1)**

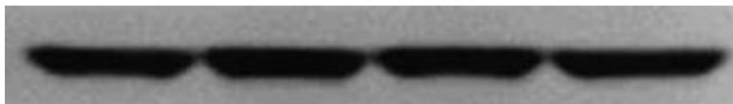

**β-actin (2)**

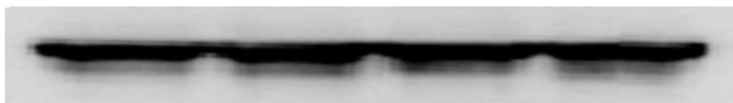

**β-actin (3)**

**Control    I/R    TAX 5 μM    TAX 15 μM**
